# Supplementary material
Source: HighWire-hosted journal article supplement (https://bmjopensem.bmj.com/content/suppl/2021/01/20/7.1.e000895)

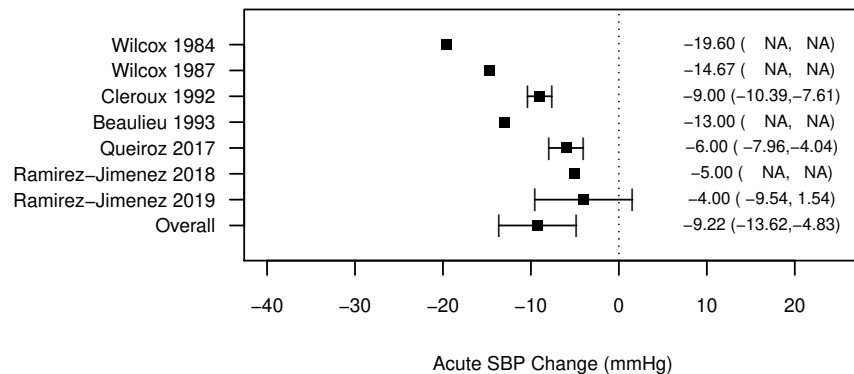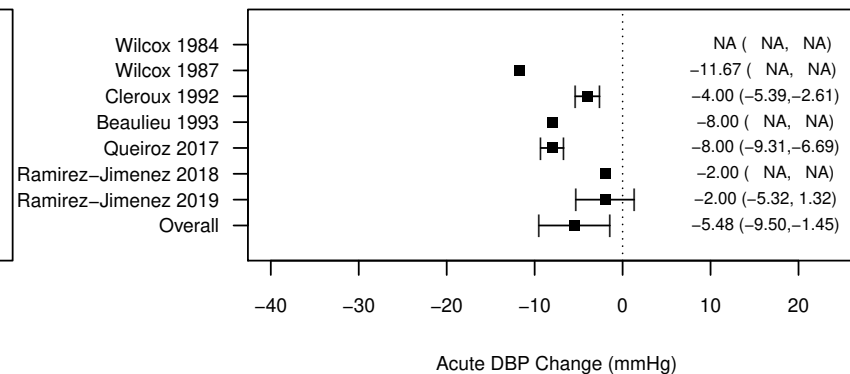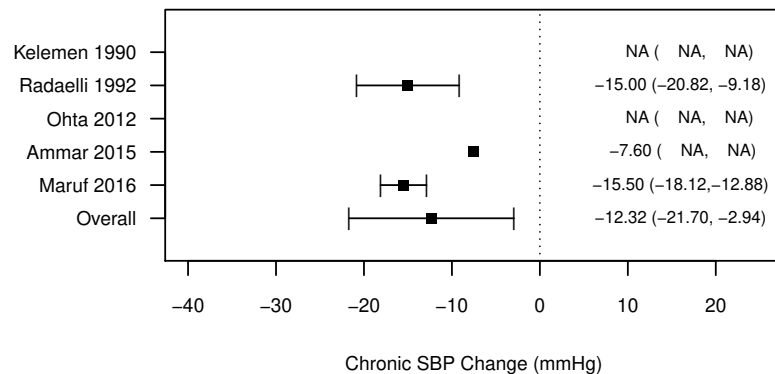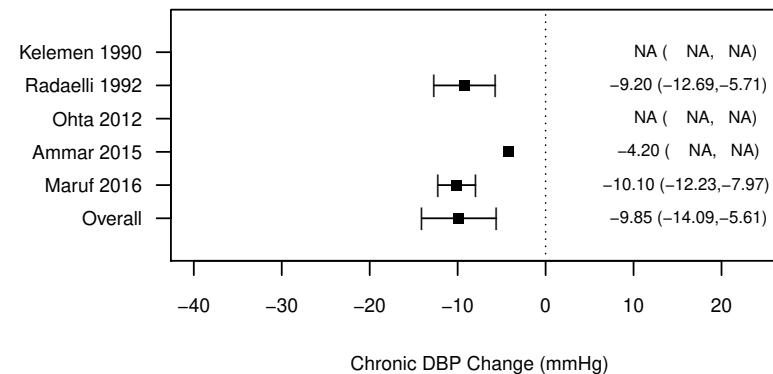

Supplement: bmjsem-2020-000895supp009_data_supplement.pdf [file bmjsem-2020-000895supp009_data_supplement.pdf]
